# Supplementary material for: A Study on the Adjustment of Emulsification Degree to Interlayer Interference in Class III Reservoir
Source: Hindawi journal article supplement (doi:10.1155/2019/6186018), 2019-02-20
Supplement: f1 [file 6186018.f1.pdf]

## Supplementary Material

### A Study on the Adjustment of Emulsification Degree to Interlayer Interference in Class III Reservoir

Bin Huang<sup>1</sup>, Tingge Dai<sup>1</sup>, Hongjuan Liu<sup>3</sup>, Cheng Fu<sup>1,2,\*</sup>, Tingting Zhu<sup>1</sup>, and Wei Zhang<sup>4</sup>

<sup>1</sup> College of Petroleum Engineering, Northeast Petroleum University, Daqing 163318, China; huangbin111@163.com (B.H.); daitingge79@163.com (T.D.); ztt950618@163.com(T.Z.)

<sup>2</sup> Post-Doctoral Scientific Research Station, Daqing Oilfield Company, Daqing 163413, China; Fucheng502a@163.com

<sup>3</sup> Daqing Oilfield Limited Company No. 1 Oil Production Plant Daqing 163000, China; liuhongjuan@petrochina.com.cn

<sup>4</sup> College of Pipeline and Civil Engineering, China University of Petroleum (East China), Qingdao 266580, China; upc\_NGhz@163.com

\* Correspondence: Fucheng502A@163.com; Tel.: +86-18345972660.

**Figure S1.** Emulsion micrographs under different shearing strength (400X): (a) shaking; (b) 3000r/min; (c) 6000r/min; (d) 9000r/min; (e) 11000r/min; and (f) 13000r/min

**Figure S2** Emulsion micrographs under different water content (400X): (a) 20%; (b) 30%; (c) 40%; (d) 50%; (e) 60%; and (f) 70%

**Figure S3.** Emulsion micrographs under different content of surfactant (100X): (a) 0.1%; (b) 0.2%; and (c) 0.3%

**Figure S4.** Emulsion micrographs under different content of alkali: (a) 0.2% (400X); (b) 0.6% (400X); and (c) 1.2% (100X)

**Figure S5.** Emulsion micrographs under different content of polymer (100X): (a) 600mg/L; (b) 1200mg/L; and (c) 1800mg/L

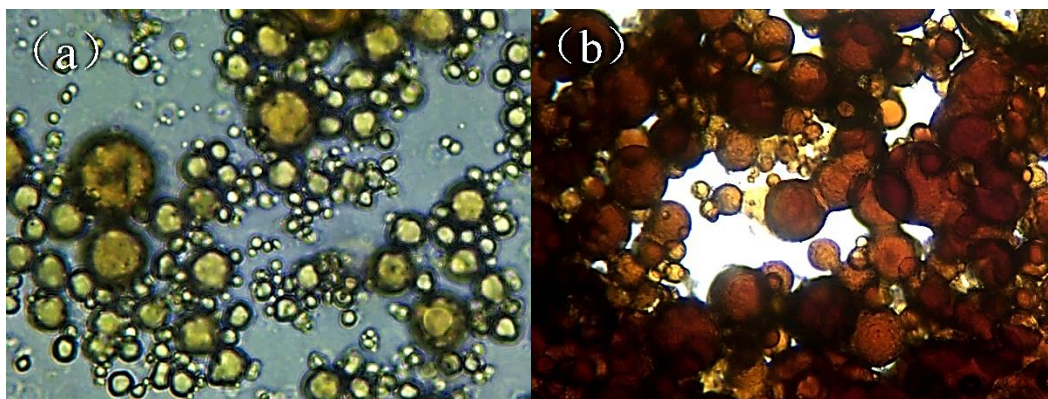

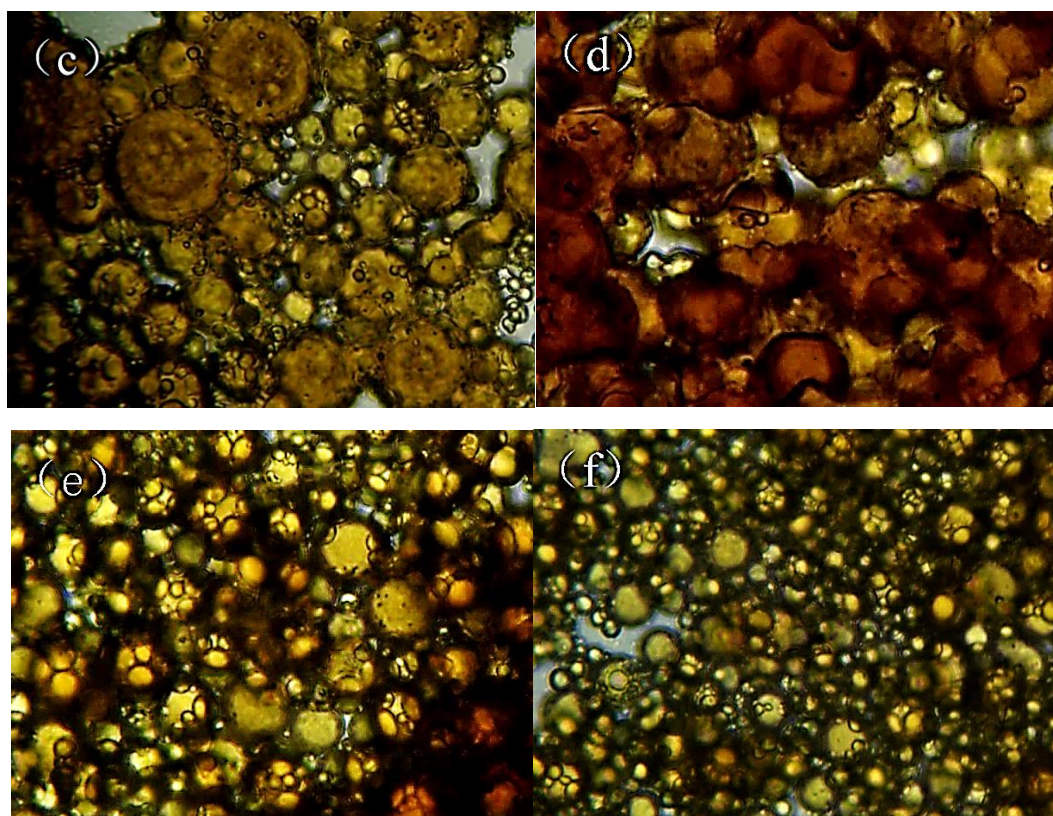

**Figure S1.**

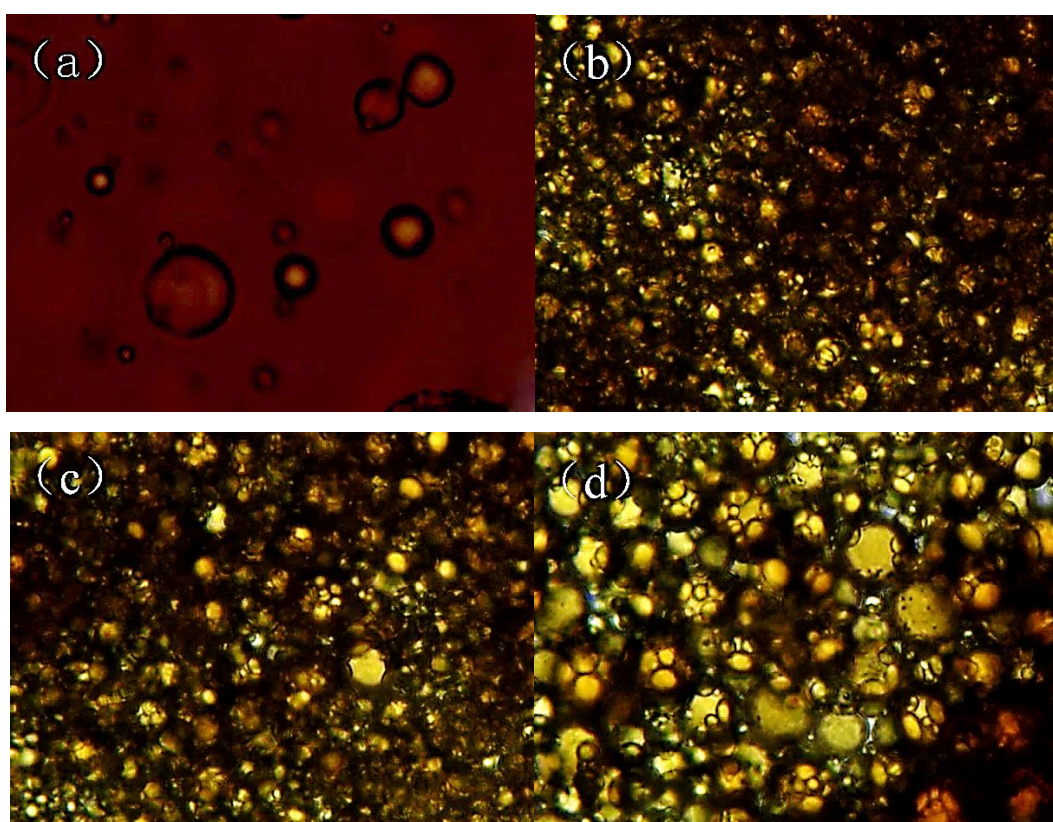

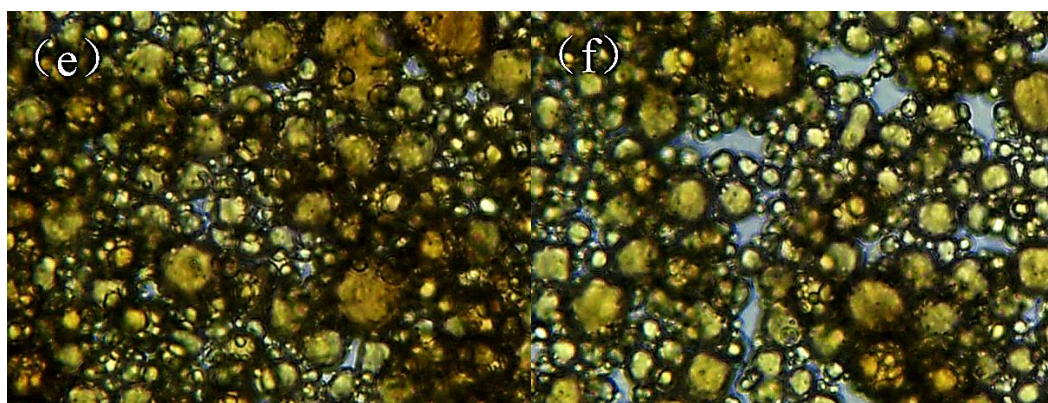

**Figure S2**

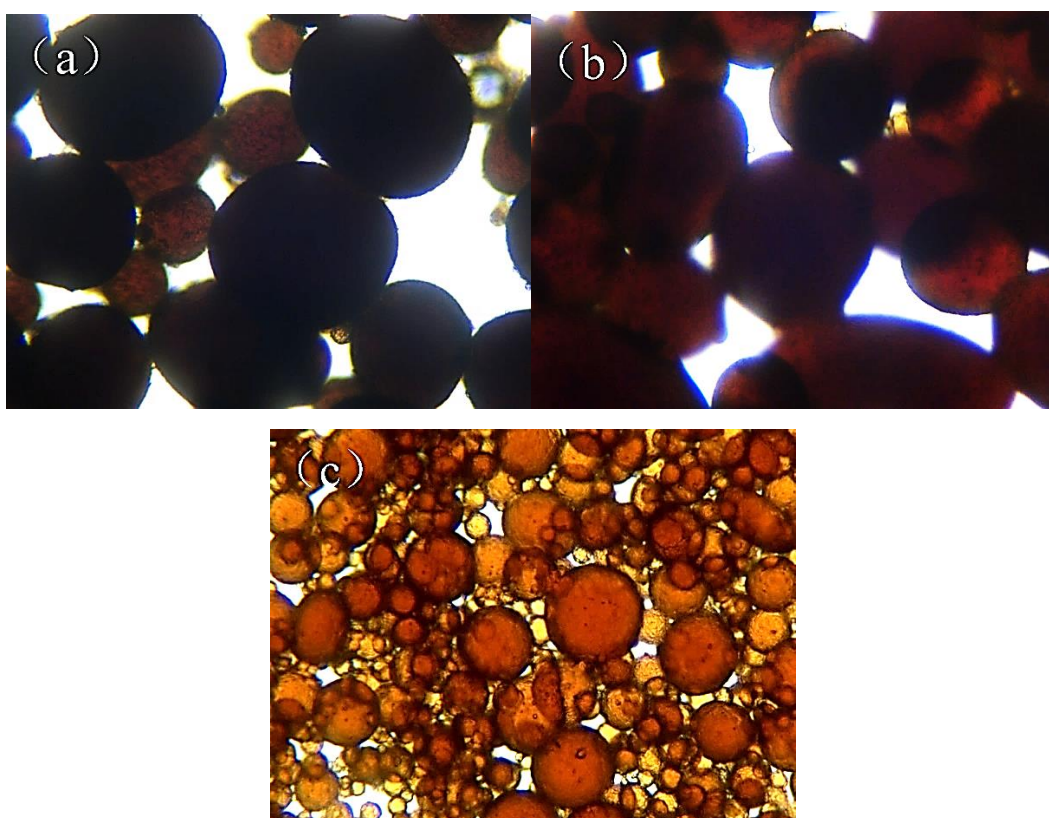

**Figure S3**

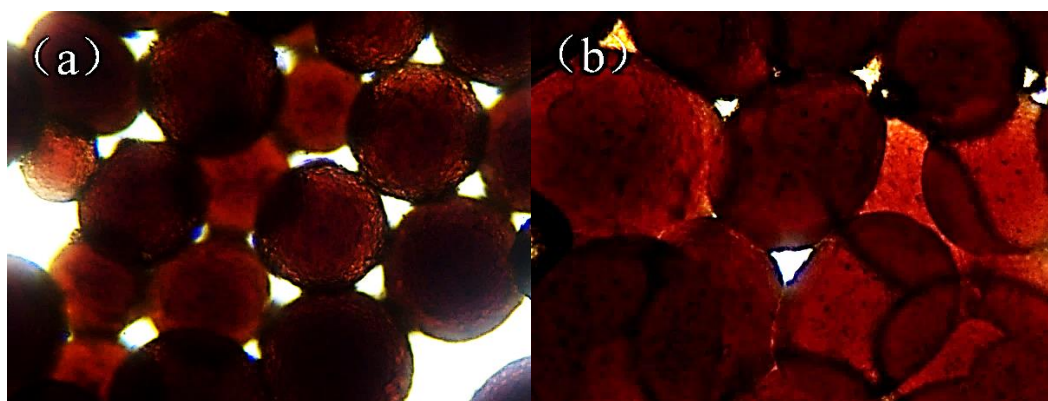

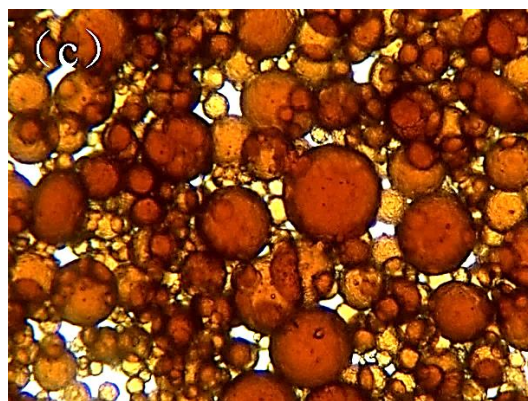

**Figure S4**

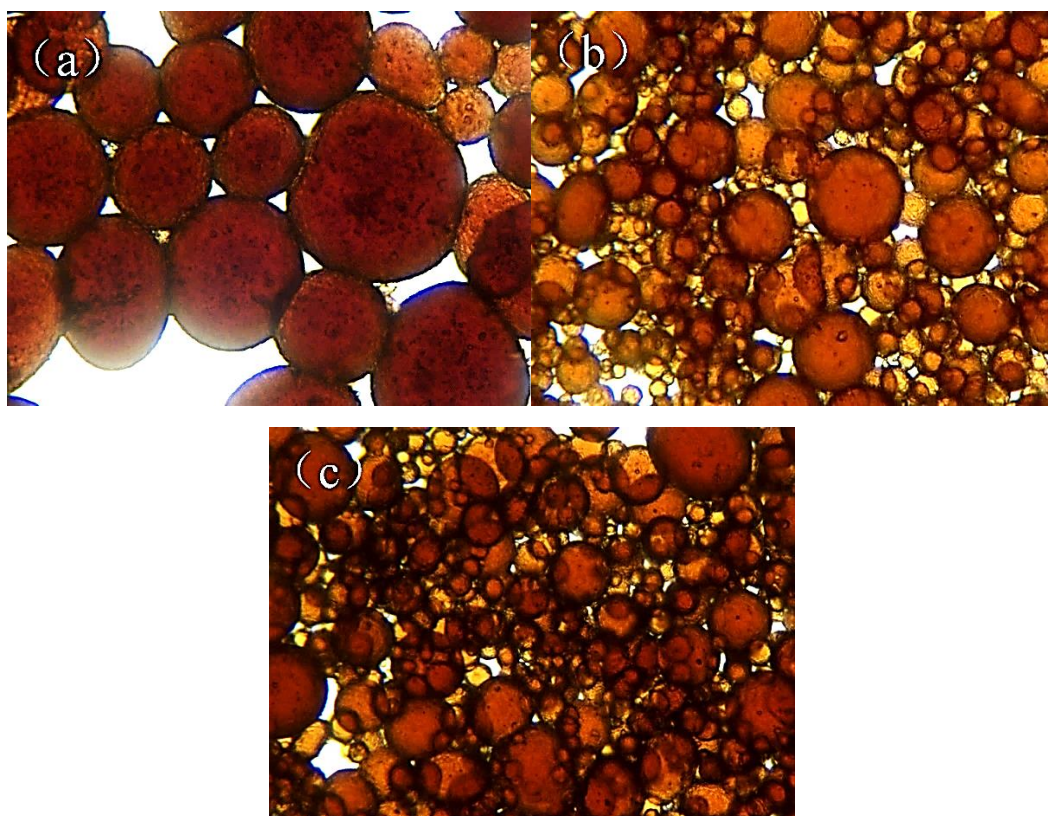

**Figure S5**
